# Supplementary material for: The phosphatidylserine receptor TIM4 utilizes integrins as coreceptors to effect phagocytosis
Source: PubMed Central journal article supplement — Mol Biol Cell. 2014 May 1;25(9):1511–22. doi: 10.1091/mbc.E13-04-0212 (PMC4004599; doi:10.1091/mbc.e13-04-0212), 2014-05-01

# Supplemental Materials

*Molecular Biology of the Cell*

Flannagan et al.

#### SUPPLEMENTARY FIGURE LEGEND

**Supplementary Figure 1. Integrin  $\beta$ 3 and integrin  $\beta$ 5 contribute to TIM4-driven phagocytosis.** (A) Percent knockdown of integrin  $\beta$ 3 and integrin  $\beta$ 5 mRNA, determined by real-time qPCR, after treatment with the corresponding siRNA. Data are expressed relative to scrambled siRNA-treated cells and are means  $\pm$  S. E. M of three independent determinations. (B) Effect of integrin  $\beta$ 3 and  $\beta$ 5 knockdown on TIM4-dependent phagocytosis. Data were normalized to scrambled siRNA-treated cells and are the mean  $\pm$  S. E. M. of three independent experiments. \*\* indicates  $p \leq 0.01$ .

#### SUPPLEMENTARY VIDEO LEGENDS

**Supplementary Video 1. Behaviour of PM-GFP upon PtdSer bead contact.** Beads were coated with PtdSer and labeled also with rhodamine-PtdEth for visualization (red). The bead initially in the lower left quadrant was captured by laser tweezers and driven onto the surface of a PM-GFP-expressing cell. The behaviour of the membrane marker was monitored by time-lapse spinning disc confocal microscopy. The movie, acquired at a rate of 10 frames/min, is 36 frames long and is played at a frame rate of 7 frames/sec.

**Supplementary Video 2. Accumulation of TIM4-GFP at sites of contact with PtdSer-coated beads.** Beads were coated with PtdSer and labeled also with rhodamine-PtdEth for visualization (red). The bead initially in the lower right quadrant was captured by laser tweezers and driven onto the surface of a TIM4-GFP-expressing cell. The behaviour of the receptor was monitored by time-lapse spinning disc confocal microscopy. The movie, acquired at a rate of 10 frames/min, is 51 frames long and is played at a frame rate of 7 frames/sec.

# Supplementary Figure 1

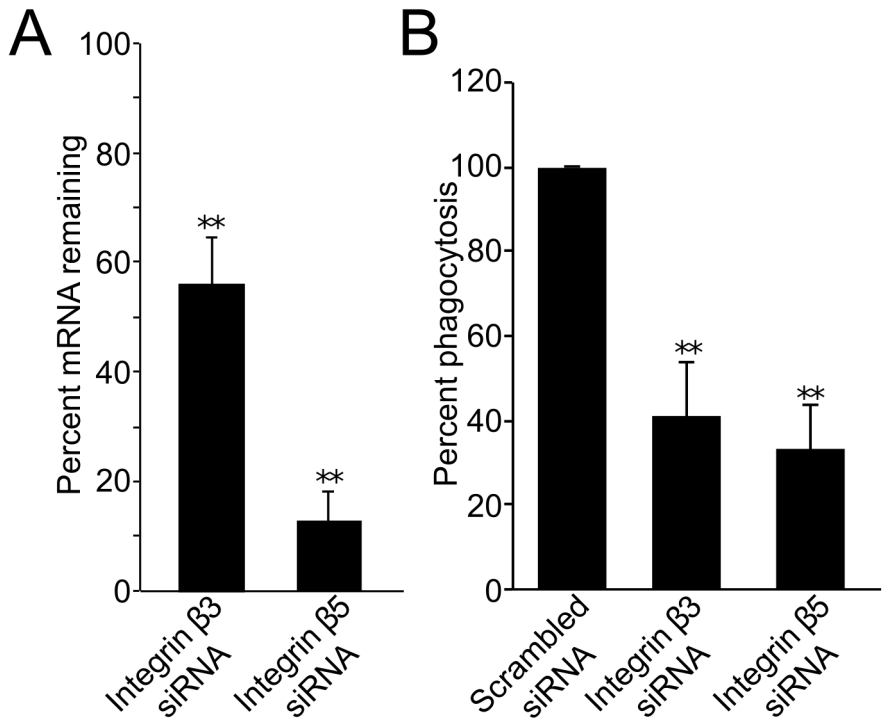

Supplement: supp_E13-04-0212v1_CombinedSupMats.pdf [file supp_E13-04-0212v1_CombinedSupMats.pdf]
